# Supplementary material for: Beyond the Startup Stage: The Founding Team’s Human Capital, New Venture’s Stage of Life, Founder–CEO Duality, and Breakthrough Innovation
Source: Atypon-hosted journal article supplement (doi:10.1287/orsc.2017.1152), 2017-09-20
Supplement: orsc.2017.1152-sm.pdf [file orsc.2017.1152-sm.pdf]

## Online Appendix

**Table 1. Robustness Check for Educational Heterogeneity**

| Educational heterogeneity        | Startup Stage                                           |                                                                  | Growth Stage                                            |                                                                  |
|----------------------------------|---------------------------------------------------------|------------------------------------------------------------------|---------------------------------------------------------|------------------------------------------------------------------|
|                                  | Measure reported in paper (all educational backgrounds) | Robustness check (Measure including only scientific backgrounds) | Measure reported in paper (all educational backgrounds) | Robustness check (Measure including only scientific backgrounds) |
| Variables                        | Model 1                                                 | Model 2                                                          | Model 3                                                 | Model 4                                                          |
| <i>Theoretical Variables</i>     |                                                         |                                                                  |                                                         |                                                                  |
| EH x Duality                     |                                                         |                                                                  | -1.65**                                                 | -1.62**                                                          |
|                                  | 3.61** (0.38)                                           | 2.87** (1.34)                                                    | (0.29)                                                  | (0.29)                                                           |
| FE x Duality                     |                                                         |                                                                  | -2.60**                                                 | -2.68**                                                          |
|                                  | 1.43** (0.43)                                           | 1.51** (0.52)                                                    | (0.28)                                                  | (0.28)                                                           |
| <b>Educational Heterogeneity</b> | <b>0.95*</b><br><b>(0.12)</b>                           | <b>0.67*</b><br><b>(0.12)</b>                                    | <b>1.35** (0.13)</b>                                    | <b>1.01** (0.13)</b>                                             |
| Founding Experience              | 0.63** (0.18)                                           | 0.69** (0.18)                                                    | 1.74** (0.12)                                           | 1.85** (0.13)                                                    |
| Founder-CEO duality              |                                                         |                                                                  | -0.76**                                                 | -1.01**                                                          |
|                                  | 0.98** (0.27)                                           | 1.06** (0.30)                                                    | (0.10)                                                  | (0.10)                                                           |
| <i>Control Variables</i>         |                                                         |                                                                  |                                                         |                                                                  |
| Founder-CEO Succession           | 0.62<br>(0.41)                                          | 0.66<br>(0.41)                                                   | -0.53**<br>(0.17)                                       | -0.63**<br>(0.20)                                                |
| Industry Tenure Variance         | 0.67*<br>(0.20)                                         | 0.73*<br>(0.20)                                                  | -1.20**<br>(0.24)                                       | -1.17**<br>(0.24)                                                |
| F. Team's Familiarity            | 0.69*<br>(0.29)                                         | 0.65*<br>(0.32)                                                  | -1.20**<br>(0.24)                                       | -1.23**<br>(0.24)                                                |
| Public Institution               |                                                         |                                                                  | -1.08**                                                 | -1.11**                                                          |
| Firm's Size (Log)                | -0.56* (0.26)                                           | -0.61* (0.26)                                                    | (0.13)                                                  | (0.13)                                                           |
|                                  | 0.21*<br>(0.09)                                         | 0.18*<br>(0.09)                                                  | -0.22**<br>(0.05)                                       | -0.19**<br>(0.05)                                                |
| Firm's Tech. Breadth             | -0.52**<br>(0.09)                                       | -0.58**<br>(0.09)                                                | 0.30** (0.06)                                           | 0.34** (0.06)                                                    |
| T. since II event                | -0.30**<br>(0.05)                                       | -0.31**<br>(0.05)                                                | -0.04† (0.01)                                           | -0.02<br>(0.02)                                                  |
| Prior R&D                        | -0.14**<br>(0.03)                                       | -0.14**<br>(0.03)                                                | 0.03** (0.00)                                           | 0.02** (0.00)                                                    |
| Star Inventor Recruitment        | 2.13** (0.22)                                           | 2.21** (0.22)                                                    | 0.34** (0.11)                                           | 0.38** (0.11)                                                    |
| Venture Capital (Log)            | 0.39*<br>(0.19)                                         | 0.43*<br>(0.19)                                                  | -1.28**<br>(0.11)                                       | -1.29**<br>(0.11)                                                |
| Tech Sector Density              | -0.00†<br>(0.00)                                        | -0.00†<br>(0.00)                                                 | 0.00** (0.00)                                           | 0.01** (0.00)                                                    |
| Mills ratio: Failure             | 0.61** (0.13)                                           | 0.62** (0.13)                                                    | 1.05** (0.07)                                           | 1.05** (0.07)                                                    |
| Mills ratio: F. Team's Survival  | 1.05** (0.25)                                           | 1.03** (0.25)                                                    | 0.94** (0.24)                                           | 0.94** (0.24)                                                    |
| Constant                         | -2.48* (0.36)                                           | -2.46* (0.07)                                                    | 2.76** (0.38)                                           | 2.85** (0.31)                                                    |
| In_Theta                         | -4.18*                                                  | -4.17*                                                           | 2.22*                                                   | 2.09*                                                            |
| Wald Chi-Square                  | 735.22                                                  | 738.22                                                           | 2905.50                                                 | 2909.12                                                          |
| Log Likelihood                   | -874.28                                                 | -872.01                                                          | -2054.50                                                | -2051.17                                                         |
| Number of Observations           | 62813                                                   | 62813                                                            | 43295                                                   | 43295                                                            |
| Number of II Events              | 132                                                     | 132                                                              | 512                                                     | 512                                                              |

†  $p < .1$ , \*  $p < .05$ , \*\*  $p < .01$ ; EH = Educational heterogeneity, FE = Founding experience, E = Early Stage, G = Growth Stage, II = Impactful innovation event

**Table 2. Robustness Check for Founding Experience**

| Founding experience measures           | Startup Stage                                                  |                                                       | Growth Stage                                                   |                                                       |
|----------------------------------------|----------------------------------------------------------------|-------------------------------------------------------|----------------------------------------------------------------|-------------------------------------------------------|
|                                        | Measure reported in paper (# members with founding experience) | Robustness check (# new ventures founded by founders) | Measure reported in paper (# members with founding experience) | Robustness check (# new ventures founded by founders) |
| Variables                              | Model 1                                                        | Model 2                                               | Model 3                                                        | Model 4                                               |
| <i>Theoretical Variables</i>           |                                                                |                                                       |                                                                |                                                       |
| EH x Duality                           | 3.61** (0.38)                                                  | 3.92** (1.34)                                         | -1.65** (0.29)                                                 | -1.78** (0.29)                                        |
| FE x Duality                           | 1.43** (0.43)                                                  | 1.46** (0.52)                                         | -2.60** (0.28)                                                 | -2.59** (0.28)                                        |
| Educational Heterogeneity              | 0.95* (0.12)                                                   | 0.93* (0.12)                                          | 1.35** (0.13)                                                  | 1.25** (0.13)                                         |
| <b>Founding Experience</b>             | <b>0.63** (0.18)</b>                                           | <b>0.72** (0.18)</b>                                  | <b>1.74** (0.12)</b>                                           | <b>1.82** (0.13)</b>                                  |
| Founder-CEO duality                    | 0.98** (0.27)                                                  | 0.96** (0.30)                                         | -0.76** (0.10)                                                 | -0.94** (0.10)                                        |
| <i>Control Variables</i>               |                                                                |                                                       |                                                                |                                                       |
| Founder-CEO Succession                 | 0.62 (0.41)                                                    | 0.6 (0.41)                                            | -0.53** (0.17)                                                 | -0.63** (0.20)                                        |
| Industry Tenure Variance               | 0.67* (0.20)                                                   | 0.67* (0.20)                                          | -1.20** (0.24)                                                 | -1.17** (0.24)                                        |
| F. Team's Familiarity                  | 0.69* (0.29)                                                   | 0.69* (0.32)                                          | -1.20** (0.24)                                                 | -1.19** (0.24)                                        |
| Public Institution                     |                                                                |                                                       | -1.08** (0.13)                                                 | -1.06** (0.13)                                        |
| Firm's Size (Log)                      | -0.56* (0.26)                                                  | -0.56* (0.26)                                         | -0.22** (0.05)                                                 | -0.22** (0.05)                                        |
| Firm's Tech. Breadth                   | -0.52** (0.09)                                                 | -0.52** (0.09)                                        |                                                                | 0.07 (0.06)                                           |
| T. since II event                      | -0.30** (0.05)                                                 | -0.36** (0.05)                                        | 0.30** (0.06)                                                  | -0.01 (0.02)                                          |
| Prior R&D                              | -0.14** (0.03)                                                 | -0.14** (0.03)                                        | -0.04† (0.01)                                                  |                                                       |
| Star Inventor Recruitment              | 2.13** (0.22)                                                  | 2.21** (0.22)                                         | 0.03** (0.00)                                                  | 0.01** (0.00)                                         |
| Venture Capital (Log)                  | 0.39* (0.19)                                                   | 0.40* (0.19)                                          | -1.28** (0.11)                                                 | -1.29** (0.11)                                        |
| Tech Sector Density                    | -0.00† (0.00)                                                  | -0.00† (0.00)                                         | 0.00** (0.00)                                                  | 0.00** (0.00)                                         |
| <i>Mills ratio: Failure</i>            | 0.61** (0.13)                                                  | 0.61** (0.13)                                         | 1.05** (0.07)                                                  | 1.05** (0.07)                                         |
| <i>Mills ratio: F. Team's Survival</i> | 1.05** (0.25)                                                  | 1.03** (0.25)                                         | 0.94** (0.24)                                                  | 0.94** (0.24)                                         |
| <i>Constant</i>                        | -2.48* (0.36)                                                  | -2.46* (0.07)                                         | 2.76** (0.38)                                                  | 2.97** (0.38)                                         |
| <i>In_Theta</i>                        | -4.18*                                                         | -4.19*                                                | 2.22*                                                          | 2.08*                                                 |
| <i>Wald Chi-Square</i>                 | 735.22                                                         | 733.87                                                | 2905.50                                                        | 2908.15                                               |
| <i>Log Likelihood</i>                  | -872.12                                                        | -875.28                                               | -2054.50                                                       | -2053.17                                              |
| <i>Number of Observations</i>          | 62813                                                          | 62813                                                 | 43295                                                          | 43295                                                 |
| <i>Number of II Events</i>             | 132                                                            | 132                                                   | 512                                                            | 512                                                   |

**Table 3. MANOVA for Stage of Life**

| Variables                                   | Startup stage | Growth stage | <i>F</i> | <i>p</i> |
|---------------------------------------------|---------------|--------------|----------|----------|
| Venture's size <sup>a</sup>                 | 29.16         | 156.82       | 36.18*   | 0.01     |
| Venture's intellectual capital <sup>b</sup> | 3.23          | 13.53        | 11.68*   | 0.01     |
| Venture's age <sup>c</sup>                  | 4.02          | 11.02        | 9.87*    | 0.01     |
| <i>Number of observations</i>               | 83,199        | 47,950       |          |          |

<sup>a</sup> Number of employees; <sup>b</sup> Number of patents; <sup>c</sup> Firm's age in years

**Table 4. Selection Models** (standard errors are in parentheses)

| Variables                 | Likelihood of Failure | Likelihood of Founder Succession |
|---------------------------|-----------------------|----------------------------------|
| Time to VC investment     | 0.52* (0.09)          |                                  |
| Number of new VCs         |                       | 0.18*(0.03)                      |
| Educational heterogeneity | -0.04* (0.02)         | 0.09* (0.02)                     |
| Founding experience       | -0.09* (0.03)         | 0.12* (0.06)                     |
| Founder-CEO duality       | -0.04** (0.01)        | -0.21** (0.07)                   |
| CEO-Succession            | -0.06* (0.02)         | 0.23* (0.09)                     |
| Industry Tenure Variance  | -0.03(0.02)           | 0.08 (0.05)                      |
| F. Team's Familiarity     | -0.08* (0.04)         | -0.16** (0.08)                   |
| Public Institution        | -0.45* (0.11)         | 0.23* (0.09)                     |
| Firm's Size (Log)         | -0.02 (0.02)          | 0.07* (0.03)                     |
| Firm's Tech. Breadth      | 0.08 (0.06)           | 0.03* (0.00)                     |
| T. since BI event         | -0.12** (0.05)        | 0.14* (0.06)                     |
| Prior R&D                 | -0.02 (0.02)          | -0.06* (0.03)                    |
| Star Inventor Recruitment | -0.18** (0.02)        | 0.02 (0.02)                      |
| Venture Capital (Log)     | -0.21* (0.06)         | 0.19* (0.08)                     |
| Tech Sector Density       | -0.00* (0.00)         | -0.00† (0.00)                    |
| Constant                  | 3.11(0.12)            | 4.18(0.16)                       |
| Wald Chi-Square           | 577.16                | 721.04                           |

**Table 5. Robustness check for the Likelihood of Breakthrough Innovation (5%)**

| Variables                              | Startup Stage Ventures |                          |                |                | Growth Stage Ventures |                |                |                |
|----------------------------------------|------------------------|--------------------------|----------------|----------------|-----------------------|----------------|----------------|----------------|
|                                        | Model 1                | Model 2                  | Model 3        | Model 4        | Model 5               | Model 6        | Model 7        | Model 8        |
| <i>Theoretical Variables</i>           |                        |                          |                |                |                       |                |                |                |
| <i>Educational</i>                     |                        |                          |                |                |                       |                |                |                |
| Heterogeneity                          | 1.32** (0.11)          | 1.28** (0.11)            | 1.24** (0.1)   | 1.21** (0.11)  | 1.51** (0.09)         | 1.48** (0.09)  | 1.45** (0.08)  | 1.36** (0.08)  |
| Founding Experience                    | 0.71* (0.15)           | 0.69** (0.15)            | 0.66** (0.14)  | 0.63** (0.14)  | 1.88** (0.09)         | 1.86** (0.09)  | 1.83** (0.09)  | 1.77** (0.09)  |
| EH x Duality                           |                        |                          | 3.33** (0.99)  | 3.39** (0.99)  |                       |                | -1.76** (0.29) | -1.84** (0.27) |
| FE x Duality                           |                        | 1.16* (0.48)             |                | 1.32** (0.46)  |                       | -2.61** (0.22) |                | -2.55** (0.23) |
| <i>Control Variables</i>               |                        |                          |                |                |                       |                |                |                |
| Founder-CEO duality                    | 1.16** (0.23)          | 1.19** (0.24)            | 1.21** (0.24)  | 1.17** (0.23)  | -0.56** (0.06)        | -0.55** (0.06) | -0.54** (0.06) | -0.56** (0.06) |
| CEO-Succession                         | 0.66 (0.39)            | 0.64 (0.39)              | 0.63 (0.39)    | 0.62 (0.39)    | -0.57** (0.16)        | -0.59** (0.16) | -0.55** (0.16) | -0.61** (0.16) |
| Industry Tenure Variance               | 0.70** (0.19)          | 0.67* (0.20)             | 0.67* (0.20)   | 0.66* (0.19)   | -1.31** (0.18)        | -1.21** (0.18) | -1.27** (0.18) | -1.24** (0.18) |
| F. Team's Familiarity                  | 0.62* (0.27)           | 0.59* (0.26)             | 0.57* (0.26)   | 0.57* (0.26)   | -1.27** (0.23)        | -1.31** (0.21) | -1.33** (0.21) | -1.30** (0.21) |
| Public Institution                     | -0.66* (0.30)          | -0.64* (0.30)            | -0.61* (0.29)  | -0.59* (0.26)  | -1.19** (0.13)        | -1.17** (0.13) | -1.14** (0.13) | -1.11** (0.13) |
| Firm's Size (Log)                      | 0.20 (0.10)            | 0.21 <sup>†</sup> (0.10) | 0.22* (0.10)   | 0.23* (0.10)   | -0.19** (0.05)        | -0.20** (0.05) | -0.19** (0.05) | -0.20** (0.05) |
| Firm's Tech. Breadth                   | -0.49** (0.09)         | -0.50** (0.09)           | -0.52** (0.09) | -0.50** (0.09) | 0.36** (0.05)         | 0.35** (0.05)  | 0.30** (0.05)  | 0.32** (0.06)  |
| T. since BI event                      | -0.29** (0.05)         | -0.24** (0.05)           | -0.25** (0.05) | -0.26** (0.05) | -0.02 (0.02)          | -0.02 (0.02)   | -0.02 (0.02)   | -0.02 (0.02)   |
| Prior R&D                              | -0.11** (0.03)         | -0.12** (0.03)           | -0.12** (0.03) | -0.12** (0.03) | 0.03** (0.00)         | 0.02** (0.00)  | 0.02** (0.00)  | 0.02** (0.00)  |
| Star Inventor Recruitment              | 2.29** (0.20)          | 2.31** (0.19)            | 2.27** (0.20)  | 2.29** (0.20)  | 0.37** (0.10)         | 0.35** (0.11)  | 0.35** (0.11)  | 0.36** (0.10)  |
| Venture Capital (Log)                  | 0.45* (0.15)           | 0.44* (0.15)             | 0.43* (0.15)   | 0.43* (0.15)   | -1.32** (0.09)        | -1.31** (0.09) | -1.31** (0.09) | -1.32** (0.09) |
| Tech Sector Density                    | -0.00* (0.00)          | -0.00* (0.00)            | -0.00* (0.00)  | -0.00* (0.00)  | 0.00** (0.00)         | 0.00** (0.00)  | 0.00** (0.00)  | 0.00** (0.00)  |
| <i>Mills ratio: Failure</i>            | 0.66** (0.12)          | 0.64** (0.12)            | 0.64** (0.12)  | 0.65** (0.12)  | 1.07** (0.08)         | 1.05** (0.08)  | 1.09** (0.07)  | 1.07** (0.07)  |
| <i>Mills ratio: F. Team's Survival</i> | 1.15** (0.23)          | 1.13** (0.22)            | 1.12** (0.22)  | 1.13** (0.23)  | 1.02** (0.21)         | 1.01** (0.21)  | 1.04** (0.20)  | 1.04** (0.20)  |
| <i>Constant</i>                        | -2.69** (0.16)         | -2.58** (0.16)           | -2.56** (0.16) | -2.56* (0.16)  | 2.88** (0.39)         | 2.90** (0.40)  | 2.92** (0.39)  | 2.92** (0.39)  |
| <i>In_Theta</i>                        | -4.86*                 | -4.73*                   | -4.71*         | -4.68*         | 2.43*                 | 2.39*          | 2.32*          | 2.30*          |
| <i>Wald Chi-Square</i>                 | 594.23                 | 716.21                   | 664.18         | 752.00         | 1403.13               | 2493.03        | 1901.30        | 2902.67        |
| <i>Log Likelihood</i>                  | -8881.61               | -879.04                  | -869.21        | -854.07        | -2169.61              | -2051.11       | -2121.81       | -2028.06       |
| <i>Number of Observations</i>          | 62813                  | 62813                    | 62813          | 62813          | 43295                 | 43295          | 43295          | 43295          |
| <i>Number of BI Events</i>             | 148                    | 148                      | 148            | 148            | 541                   | 541            | 541            | 541            |

†  $p < .1$ , \*  $p < .05$ , \*\*  $p < .01$ ; EH = Educational heterogeneity, FE = Founding experience, , BI = Breakthrough innovation

**Table 6. Robustness check: Age Dependence Hypothesis (1%)**

| Variables                              | Startup Stage Ventures < 8 |                       |                       |                      | Growth Stage Ventures > 8 < 20 |                      |                      |                      |
|----------------------------------------|----------------------------|-----------------------|-----------------------|----------------------|--------------------------------|----------------------|----------------------|----------------------|
|                                        | Model 1                    | Model 2               | Model 3               | Model 4              | Model 5                        | Model 6              | Model 7              | Model 8              |
| <i>Theoretical Variables</i>           |                            |                       |                       |                      |                                |                      |                      |                      |
| <i>Educational</i>                     |                            |                       |                       |                      |                                |                      |                      |                      |
| Heterogeneity                          | 1.18** (0.11)              | 1.11** (0.12)         | 1.09* (0.12)          | 1.04** (0.12)        | 1.51** (0.13)                  | 1.43** (0.13)        | 1.38** (0.13)        | 1.46** (0.13)        |
| Founding Experience                    | 0.66* (0.15)               | 0.67** (0.16)         | 0.67** (0.16)         | 0.70** (0.16)        | 1.89** (0.09)                  | 1.86** (0.09)        | 1.82** (0.09)        | 1.77** (0.08)        |
| EH x Duality                           |                            |                       | 2.18** (0.34)         | 3.26** (0.35)        |                                |                      | -1.75** (0.29)       | -1.80** (0.28)       |
| FE x Duality                           |                            | 1.41* (0.50)          |                       | 1.45** (0.51)        |                                | -2.49** (0.27)       |                      | -2.41** (0.27)       |
| <i>Control Variables</i>               |                            |                       |                       |                      |                                |                      |                      |                      |
| Founder-CEO duality                    | 1.06** (0.19)              | 1.07** (0.19)         | 1.03** (0.19)         | 1.01** (0.19)        | -0.81** (0.12)                 | -0.89** (0.11)       | -0.91** (0.11)       | -0.86** (0.11)       |
| CEO-Succession                         | 0.59 (0.42)                | 0.60 (0.42)           | 0.60 (0.42)           | 0.61 (0.42)          | -0.58** (0.19)                 | -0.60** (0.19)       | -0.61** (0.18)       | -0.60** (0.18)       |
| Industry Tenure Variance               | 0.65* (0.20)               | 0.64* (0.20)          | 0.64* (0.20)          | 0.68* (0.20)         | -1.18** (0.21)                 | -1.21** (0.21)       | -1.23** (0.21)       | -1.26** (0.21)       |
| F. Team's Familiarity                  | 0.50** (0.10)              | 0.48* (0.10)          | 0.48** (0.10)         | 0.46* (0.10)         | 0.27* (0.08)                   | 0.25** (0.08)        | 0.25** (0.08)        | 0.22** (0.08)        |
| Public Institution                     | -0.60* (0.28)              | -0.60* (0.28)         | -0.58* (0.26)         | -0.58* (0.26)        | -1.19** (0.12)                 | -1.19** (0.12)       | -1.16** (0.11)       | -1.15** (0.11)       |
| Firm's Size (Log)                      | 0.26* (0.08)               | 0.26* (0.08)          | 0.24* (0.08)          | 0.23* (0.09)         | -0.19** (0.06)                 | -0.20** (0.06)       | -0.19** (0.06)       | -0.21** (0.06)       |
| Firm's Tech. Breadth                   | 0.46** (0.08)              | 0.44** (0.08)         | 0.44** (0.08)         | 0.42** (0.09)        | 0.33** (0.05)                  | 0.32** (0.05)        | 0.32** (0.05)        | 0.32** (0.05)        |
| T. since BI event                      | -0.38** (0.06)             | -0.36** (0.05)        | -0.36** (0.05)        | -0.36** (0.05)       | -0.01 (0.02)                   | -0.01 (0.02)         | -0.01 (0.02)         | -0.01 (0.02)         |
| Prior R&D                              | -0.11** (0.04)             | -0.13** (0.04)        | -0.14** (0.04)        | -0.14** (0.04)       | 0.03** (0.00)                  | 0.02** (0.00)        | 0.02** (0.00)        | 0.01** (0.00)        |
| Star Inventor Recruitment              | 2.30** (0.22)              | 2.33** (0.19)         | 2.30** (0.22)         | 2.29** (0.22)        | 0.39** (0.10)                  | 0.41** (0.09)        | 0.43** (0.09)        | 0.43** (0.09)        |
| Venture Capital (Log)                  | 0.37* (0.18)               | 0.38* (0.18)          | 0.38* (0.18)          | 0.39* (0.18)         | -1.38** (0.11)                 | -1.37** (0.11)       | -1.37** (0.11)       | -1.38** (0.11)       |
| Tech Sector Density                    | -0.00 (0.00)               | -0.00 (0.00)          | -0.00 (0.00)          | -0.00 (0.00)         | 0.01** (0.00)                  | 0.00** (0.00)        | 0.00** (0.00)        | 0.00** (0.00)        |
| <i>Mills ratio: Failure</i>            | <i>0.64** (0.13)</i>       | <i>0.63** (0.13)</i>  | <i>0.63** (0.13)</i>  | <i>0.62** (0.13)</i> | <i>1.05** (0.07)</i>           | <i>1.03** (0.07)</i> | <i>1.03** (0.07)</i> | <i>1.05** (0.07)</i> |
| <i>Mills ratio: F. Team's Survival</i> | <i>1.13** (0.24)</i>       | <i>1.13** (0.24)</i>  | <i>1.09** (0.24)</i>  | <i>1.11** (0.24)</i> | <i>0.96** (0.23)</i>           | <i>0.95** (0.23)</i> | <i>0.94** (0.23)</i> | <i>0.93** (0.23)</i> |
| <i>Constant</i>                        | <i>-2.70** (0.46)</i>      | <i>-2.67** (0.46)</i> | <i>-2.64** (0.46)</i> | <i>-2.64* (0.46)</i> | <i>2.90** (0.40)</i>           | <i>2.90** (0.40)</i> | <i>2.89** (0.39)</i> | <i>2.87** (0.39)</i> |
| <i>In_Theta</i>                        | <i>-5.09*</i>              | <i>-4.93*</i>         | <i>-4.95*</i>         | <i>-4.62*</i>        | <i>2.55*</i>                   | <i>2.59*</i>         | <i>2.28*</i>         | <i>2.12*</i>         |
| <i>Wald Chi-Square</i>                 | <i>593.04</i>              | <i>718.16</i>         | <i>698.64</i>         | <i>741.18</i>        | <i>1439.04</i>                 | <i>2341.23</i>       | <i>1845.13</i>       | <i>2916.21</i>       |
| <i>Log Likelihood</i>                  | <i>-892.65</i>             | <i>-876.14</i>        | <i>-869.07</i>        | <i>-858.69</i>       | <i>-2169.76</i>                | <i>-2068.06</i>      | <i>-2127.09</i>      | <i>-2046.41</i>      |
| <i>Number of Observations</i>          | <i>51965</i>               | <i>51965</i>          | <i>51965</i>          | <i>51965</i>         | <i>48536</i>                   | <i>48536</i>         | <i>48536</i>         | <i>48536</i>         |
| <i>Number of BI Events</i>             | <i>126</i>                 | <i>126</i>            | <i>126</i>            | <i>126</i>           | <i>589</i>                     | <i>589</i>           | <i>589</i>           | <i>589</i>           |

†  $p < .1$ , \*  $p < .05$ , \*\*  $p < .01$ ; EH = Educational heterogeneity, FE = Founding experience, BI = Breakthrough innovation
